# Supplementary material for: Social Media Interventions to Promote HIV Testing, Linkage, Adherence, and Retention: Systematic Review and Meta-Analysis
Source: PubMed Central journal article supplement (PMC5722976; doi:10.2196/jmir.7997), 2017-11-24
Supplement: jmir_v19i11e394_app2.pdf [file jmir_v19i11e394_app2.pdf]

**Table S2: Quality assessment of the studies included**

| Study                     | Methods for selecting study participants | Methods for measuring exposure and outcome variables | Design-specific source of bias | Method of control confounding | Statistical methods | Other bias |
|---------------------------|------------------------------------------|------------------------------------------------------|--------------------------------|-------------------------------|---------------------|------------|
| Anand 2015                | +                                        | -                                                    | +                              | -                             | -                   | +          |
| Anand 2016                | -                                        | +                                                    | -                              | -                             | +                   | +          |
| Bauermeister 2015         | +                                        | +                                                    | -                              | +                             | +                   | +          |
| Brady 2014                | -                                        | -                                                    | +                              | -                             | -                   | +          |
| Buzdugan 2016             | -                                        | +                                                    | -                              | -                             | -                   | +          |
| Elliot 2012               | -                                        | -                                                    | +                              | -                             | -                   | +          |
| Elliot 2016               | -                                        | +                                                    | +                              | -                             | -                   | +          |
| Horvath 2013              | +                                        | +                                                    | +                              | +                             | +                   | +          |
| Huang 2015                | -                                        | -                                                    | +                              | -                             | -                   | +          |
| Hyden 2016                | -                                        | -                                                    | +                              | -                             | -                   | +          |
| Jones 2015                | -                                        | -                                                    | -                              | +                             | -                   | +          |
| Ko 2013                   | +                                        | +                                                    | +                              | -                             | +                   | +          |
| Lampkin 2016              | -                                        | -                                                    | +                              | +                             | -                   | +          |
| Mendizabal-Burastero 2016 | -                                        | -                                                    | -                              | +                             | -                   | +          |
| Munro 2016                | -                                        | -                                                    | +                              | -                             | -                   | +          |
| Patel 2016                | +                                        | +                                                    | -                              | +                             | +                   | +          |
| Rhodes 2011               | -                                        | +                                                    | +                              | +                             | +                   | +          |
| Rhodes 2016               | -                                        | +                                                    | +                              | +                             | +                   | +          |
| Roberts 2015              | -                                        | -                                                    | +                              | -                             | -                   | +          |
| Sun 2015                  | +                                        | -                                                    | -                              | -                             | +                   | +          |
| Tang 2016                 | +                                        | +                                                    | -                              | +                             | +                   | +          |
| Washington 2016           | +                                        | +                                                    | +                              | +                             | +                   | +          |
| West 2015                 | -                                        | -                                                    | +                              | -                             | -                   | +          |
| Young 2013                | +                                        | +                                                    | -                              | +                             | -                   | +          |
| Young 2015                | +                                        | +                                                    | -                              | +                             | +                   | +          |
| Zou 2013                  | +                                        | -                                                    | +                              | -                             | -                   | +          |

Note: (+) means low risk of bias and (-) means high risk of bias.
