# Supplementary material for: Social Media Interventions to Promote HIV Testing, Linkage, Adherence, and Retention: Systematic Review and Meta-Analysis
Source: PubMed Central journal article supplement (PMC5722976; doi:10.2196/jmir.7997), 2017-11-24
Supplement: jmir_v19i11e394_app3.pdf [file jmir_v19i11e394_app3.pdf]

**Table S3: Results of included studies**

| <b>Study</b>      | <b>Results</b>                                                                                                                                                                                                                                             |
|-------------------|------------------------------------------------------------------------------------------------------------------------------------------------------------------------------------------------------------------------------------------------------------|
| Anand 2015        | Of 11,120 MSM receiving online counselling, 8,288 were referred for HIV testing, 1,181 received HIV testing, 183 tested positive (HIV prevalence of 15.5%). 1,112 MSM living with HIV were advised on where and how to access HIV treatment medications.   |
| Anand 2016        | Of 97 individuals, 25 (26%) opted for eHTC and 72 (74%) for online counseling and clinic-based testing. HIV prevalence was higher among eHTC than clinic-based testing participants (16% vs 1.4%, p=0.02).                                                 |
| Bauermeister 2015 | Intervention group (tailored) [N= 68]: 18 (26%) tested for HIV;<br>Control group (test-locator) [N= 36]: 4 (11%) tested for HIV.                                                                                                                           |
| Brady 2014        | Of 14,208 requesting tests kits, 9,948 (70%) returned them and 118 (1%) of them tested positive.                                                                                                                                                           |
| Buzdugan 2016     | Of 61 participants, [33 in Arm 1 (no incentives) and 28 in Arm 2 (with incentives)], 5 (8%) tested for HIV and syphilis.                                                                                                                                   |
| Elliot 2012       | 321 visitors completed risk assessment, 209 clicked through for information on home sampling. 132 test kits were requested, 73 (55%) were returned, 4 (5.5%) of which were new HIV diagnoses.                                                              |
| Elliot 2016       | 66,579 visited website, 17,361 completed risk assessment. 10,323 (93%) ordered sample kit, 5,696 (55%) returned samples, 96 (2%) were confirmed positive including 82 new diagnoses.                                                                       |
| Horvath 2013      | There was not a significant difference in improvement for overall ART adherence in intervention (n=66) compared to control condition (n=57). But there was greater improvement in taking ART within 2 hours of scheduled dose and correctly with food.     |
| Huang 2015        | There were 16,328 unique visitors and 667 HIV self-test requests. Of the 112 survey participants, 4 reported HIV positive results after testing and sought medical care. The cost per person was \$39 and cost per new case of HIV identified was \$4,400. |
| Hyden 2016        | Of 274 participants surveyed, 56% were very/somewhat likely to get tested again in next 30 days.                                                                                                                                                           |
| Jones 2015        | Of 305 people engaged or clicked on Facebook survey, 9 (3%) requested HIV test at home. 5 (56%) made appointments and tested for HIV. None were detected positive.                                                                                         |
| Ko 2013           | Of 1037 survey participants, those using the intervention website (n=552) were more likely to have HIV tests within 6 months (43.89% versus 22.31%, P<.001) than those using the control website (n=485).                                                  |

|                           |                                                                                                                                                                                                                                                    |
|---------------------------|----------------------------------------------------------------------------------------------------------------------------------------------------------------------------------------------------------------------------------------------------|
| Lampkin 2016              | 816 (90%) contacts with MSM resulted from Grindr, 562 (69%) remained engaged. Of those engaged, 35% received some combination of counseling, referrals, testing, treatment, and/or follow-up. 14 MSM tested for HIV and 1 new case was identified. |
| Mendizabal-Burastero 2016 | 7,244 men were recruited, nearly 50% tested for HIV. Nearly 200 HIV cases were diagnosed [22% of the estimated HIV cases in MSM in Guatemala City].                                                                                                |
| Munro 2016                | Of those who asked questions about sexual health, 29.4% asked about HIV testing.                                                                                                                                                                   |
| Patel 2016                | Recent HIV testing from baseline to follow-up increased from 32% to 44%;(n=130, p< 0.05). Higher proportion of participants in the avoidance condition reported recent testing or intention to test (82%), compared to approach condition (65%).   |
| Rhodes 2016               | The odds of past 12-month HIV testing at posttest compared to baseline for intervention participants (n=692) was 2.9 times as high as the odds of testing at posttest compared to baseline for comparison participants (n=600).                    |
| Rhodes 2011               | The intervention significantly increased self-reported HIV testing among chatters from 44.5% at pretest (n=346) to nearly 60% at post-test (n=315).                                                                                                |
| Roberts 2015              | During the first six months of 2014, the number of HIV tests conducted with MSM had an increase of 29% compared with the average number of tests per quarter in 2013.                                                                              |
| Sun 2014                  | Of the 2,709 interactions with app users, 240 were informational chats with health educator. 63 users requested referral for HIV testing (26.3% conversion rate).                                                                                  |
| Tang 2015                 | HIV test uptake was similar between the crowdsourced arm (37%,114/307) and the health marketing arm (35%, 111/317). Among those tested, 31% (69/225) reported a new HIV diagnosis.                                                                 |
| Washington 2016           | Those receiving the intervention were 7 times more likely to have tested for HIV than those in the control group at 6 weeks follow-up.                                                                                                             |
| West 2016                 | Of 55 people booking an appointment online, 34 (62%) attended. 24% (8/34) reported never previously testing for HIV.                                                                                                                               |
| Young 2015                | Intervention groups (N=278): 252 retained; 31% (77/252) requested HIV test and 17% (43/252) tested for HIV. Control groups (N=278): 246 retained; 15% (36/246) requested HIV test and 7% (16/246) tested for HIV                                   |

|            |                                                                                                                                                                                                                                                                                                                                                          |
|------------|----------------------------------------------------------------------------------------------------------------------------------------------------------------------------------------------------------------------------------------------------------------------------------------------------------------------------------------------------------|
| Young 2013 | Intervention group (n=57): 25 [44%] requested testing kits; 9 [16%] returned it and 8 [14%] followed up to obtain test results. Control group (n=55): 11 [20%] requested testing kits; 2 [4%] returned it and none followed up to obtain test results.                                                                                                   |
| Zou 2013   | Among the MSM tested and completed questionnaire (n=399), 153 (36%) were through banners on gay websites and 80 (19%) from gay chat rooms. HIV testing recruitment yields through instant messaging, online gay chat room, mobile phone contact, and email were 1:4, 1:6, 1:10, and 1:140, respectively (no. not available for banners on gay websites). |
